# Supplementary material for: A simple strategy based on a highly fluorinated polymer blended with a fluorinated polymer containing phosphonic acid to improve the properties of PEMFCs
Source: Royal Society of Chemistry journal article supplement (doi:10.1039/c9nj03037a), 2019-01-01
Supplement: c9nj03037a1.pdf [file c9nj03037a1.pdf]

## A simple strategy based on a high fluorinated polymer blended with a fluorinated polymer containing phosphonic acid to improve the properties of PEMFC

Supporting information

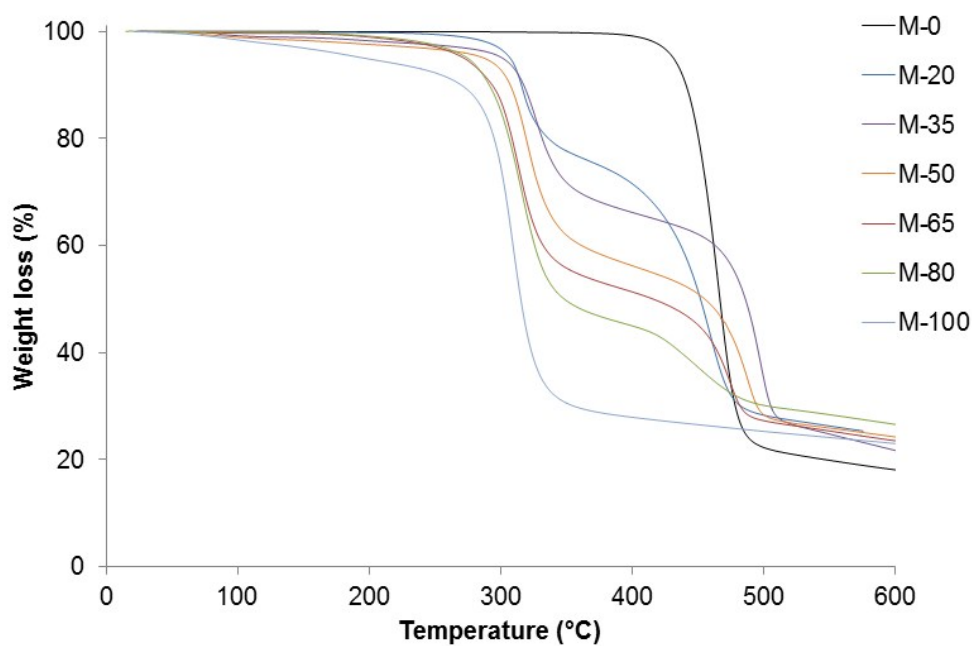

Fig. S1 TGA of membranes recorded under nitrogen atmosphere

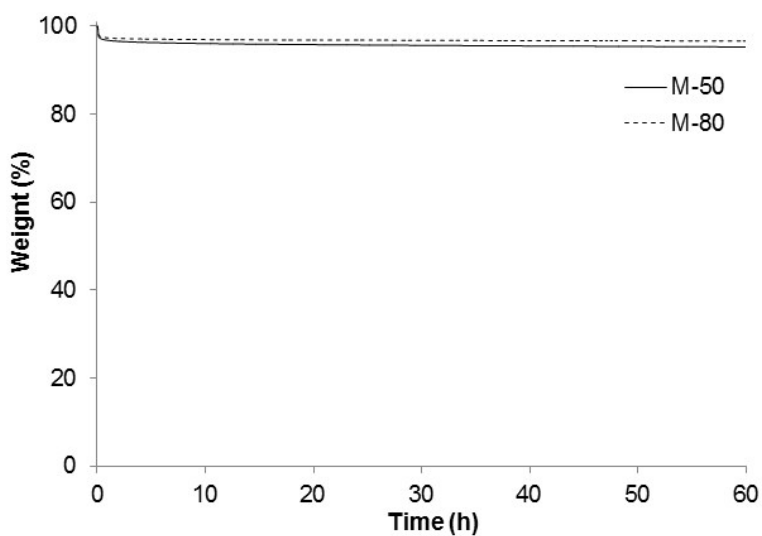

Fig. S2 Isotherms of membranes M-50 and M-80 recorded under nitrogen atmosphere at 140°C during 60hrs

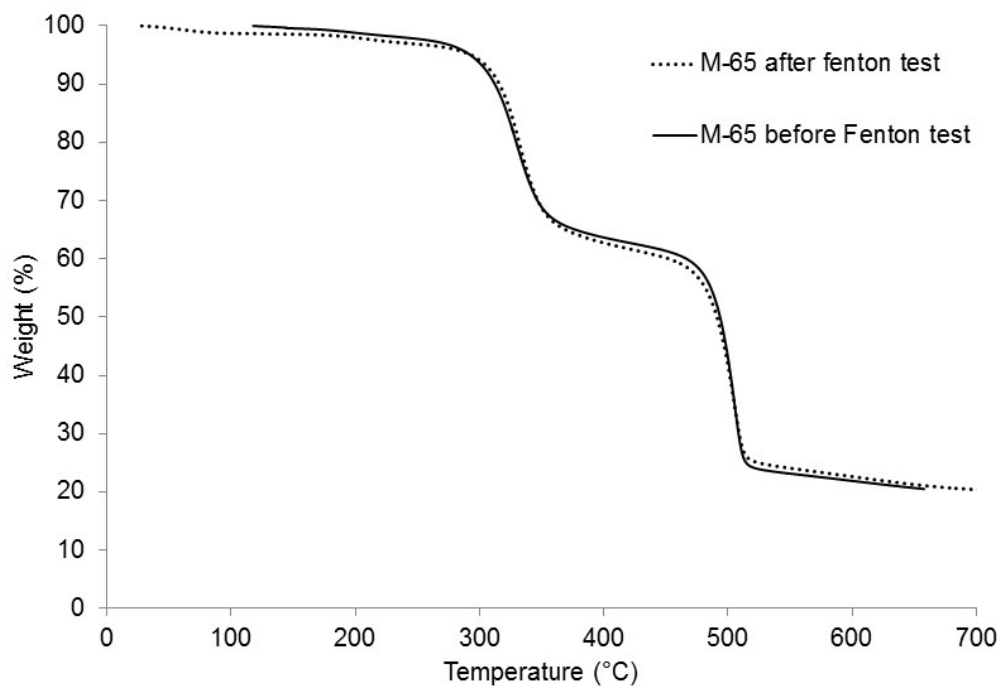

**Fig. S3** TGA of M-65 recorded under nitrogen atmosphere before and after Fenton test

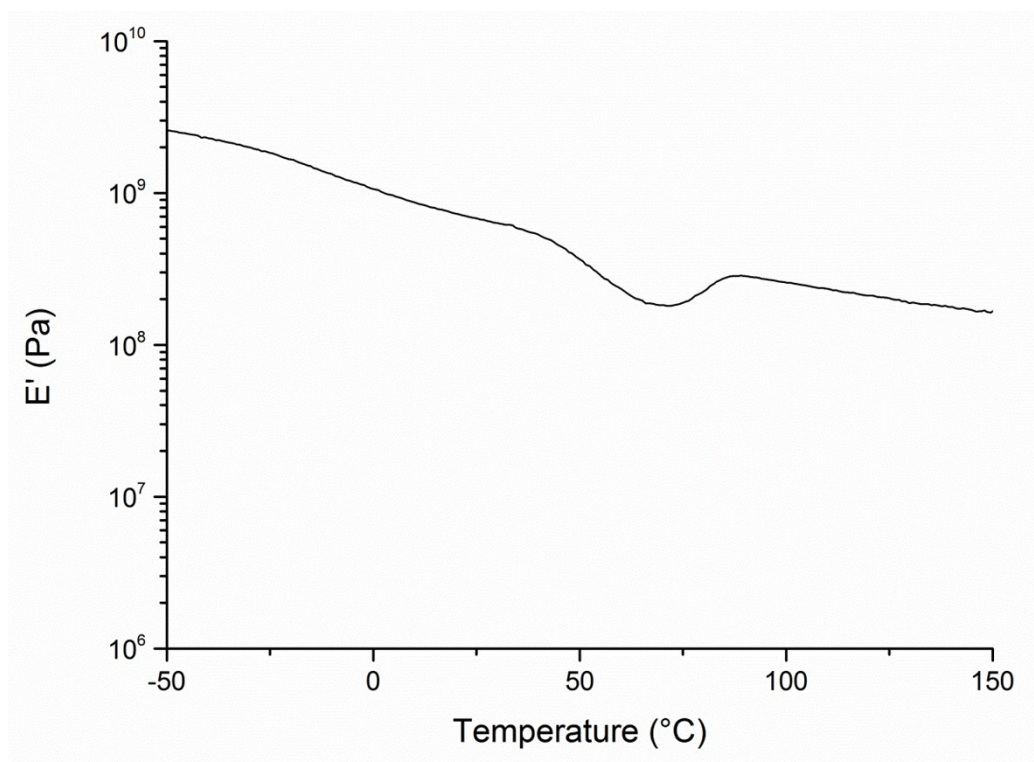

**Fig. S4** Conservation modulus versus temperature of M-0 performed at 1Hz and 2°C.min-1.

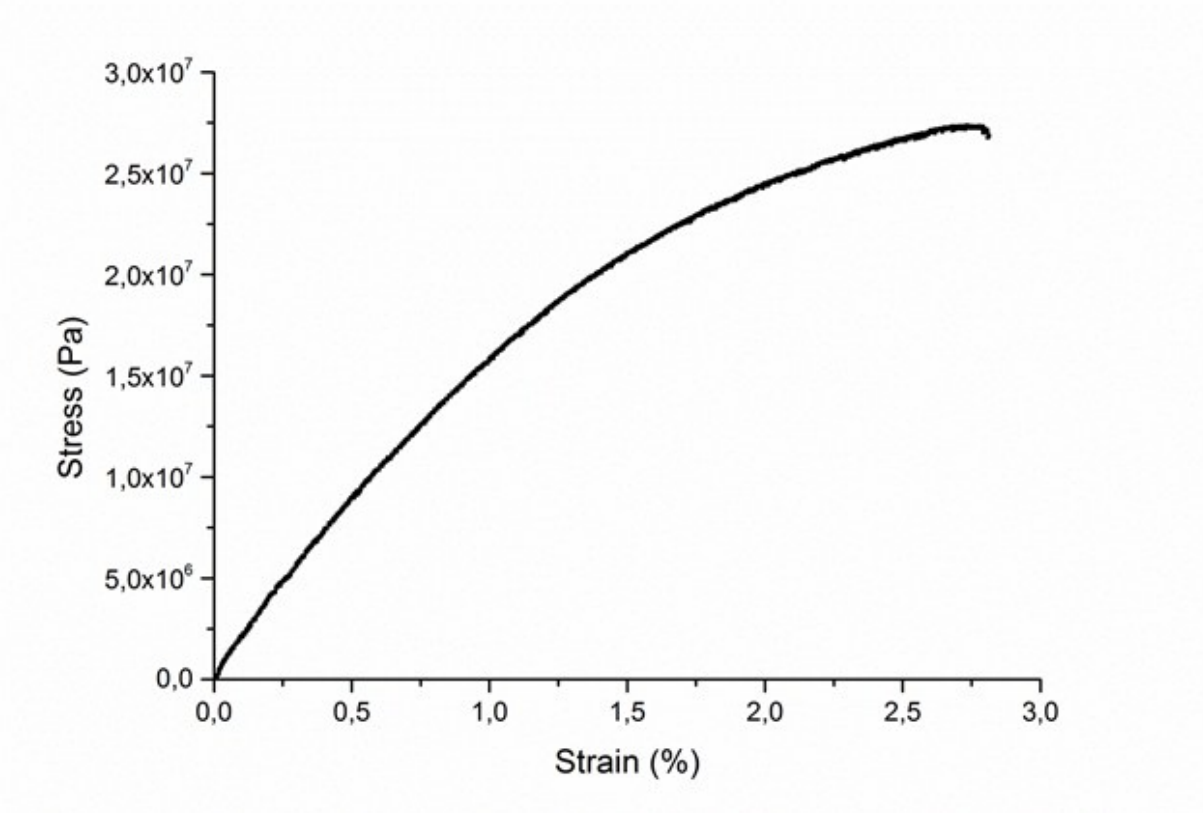

Fig. S5 Typical nominal stress-strain curve for M-50 membrane at room temperature

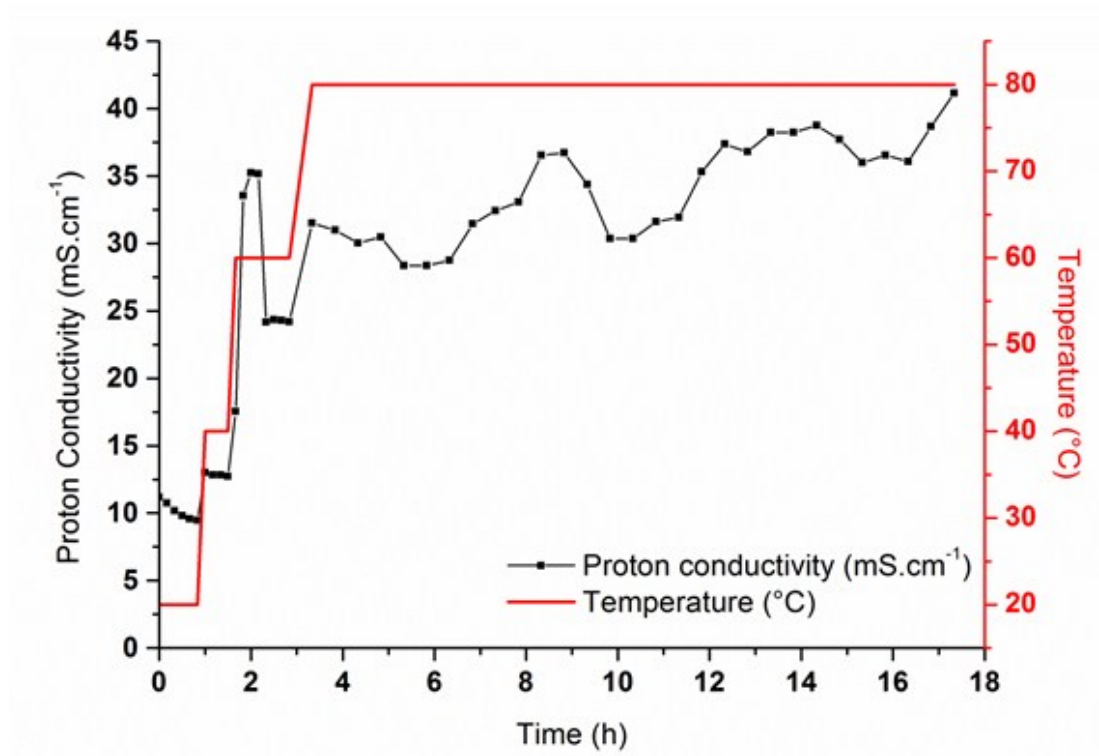

Fig. S6 Example of the evolution of Proton conductivity in liquid water versus time for various temperatures for the M-50 membrane

Table S1

Storage Modulus of the blend membranes at different temperature and RH

| Membrane | Storage modulus (MPa) <sup>a</sup> |        |         | Storage modulus (MPa) <sup>b</sup> |        |         |
|----------|------------------------------------|--------|---------|------------------------------------|--------|---------|
|          | T=-100°C                           | T=25°C | T=140°C | RH=10%                             | RH=50% | RH=100% |
| M-0      | 2500                               | 800    | 220     | 800                                | 800    | 800     |
| M-20     | 4350                               | 556    | 37      | 1400                               | 1200   | 900     |
| M-35     | 3600                               | 410    | 27      | 1000                               | 734    | 270     |
| M-50     | 2600                               | 762    | 61      | 410                                | 310    | 140     |
| M-65     | 6440                               | 1300   | 84      | 520                                | 210    | 32      |

<sup>a</sup> Determined at variable Temperature and Ambient RH<sup>b</sup> Determined at 25°C and variable RH
